# Supplementary material for: The Influence of Smoking Status on Exhaled Breath Profiles in Asthma and COPD Patients
Source: PubMed Central journal article supplement (PMC7961431; doi:10.3390/molecules26051357), 2021-03-04
Supplement: molecules-26-01357-s001.pdf [file molecules-26-01357-s001.pdf]

## Supporting Information

# The Influence of Smoking Status on Exhaled Breath Profiles in Asthma and COPD Patients

Stefania Principe <sup>1,2</sup>, Job J.M.H. van Bragt <sup>1</sup>, Cristina Longo <sup>1</sup>, Rianne de Vries <sup>1,3</sup>, Peter J. Sterk <sup>1</sup>, Nicola Scichilone <sup>2</sup>, Susanne J.H. Vijverberg <sup>1</sup>, Anke H. Maitland-van der Zee <sup>1,\*</sup>

<sup>1</sup> Department of Respiratory Medicine, Amsterdam UMC, University of Amsterdam, 1105 AZ Amsterdam, The Netherlands

<sup>2</sup> Dipartimento Universitario di Promozione della Salute, Materno Infantile, University of Palermo, Medicina Interna e Specialistica di Eccellenza "G. D'Alessandro"(PROMISE) c/o Pneumologia; AOUP "Polichinico Paolo Giaccone", 90127 Palermo, Italy

<sup>3</sup> Breathomix b.v., Leiden, 2333, Zuid Holland, The Netherlands

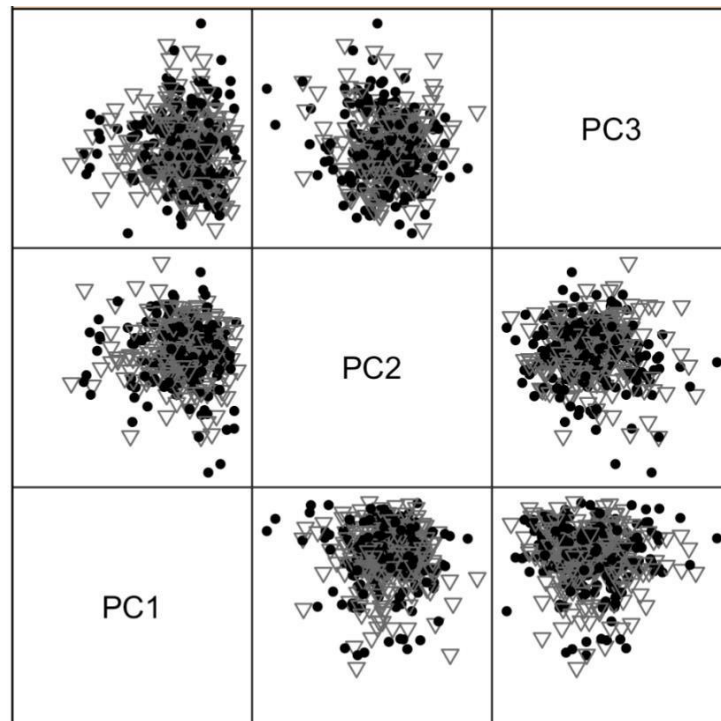

**Figure S1.** Scatter plot matrices, that shows the correlation between each Principal Components (PCs) in a population of ever or non-smokers in the overall dataset (n = 896): dotplots are representing never smokers and triangles ever smokers.

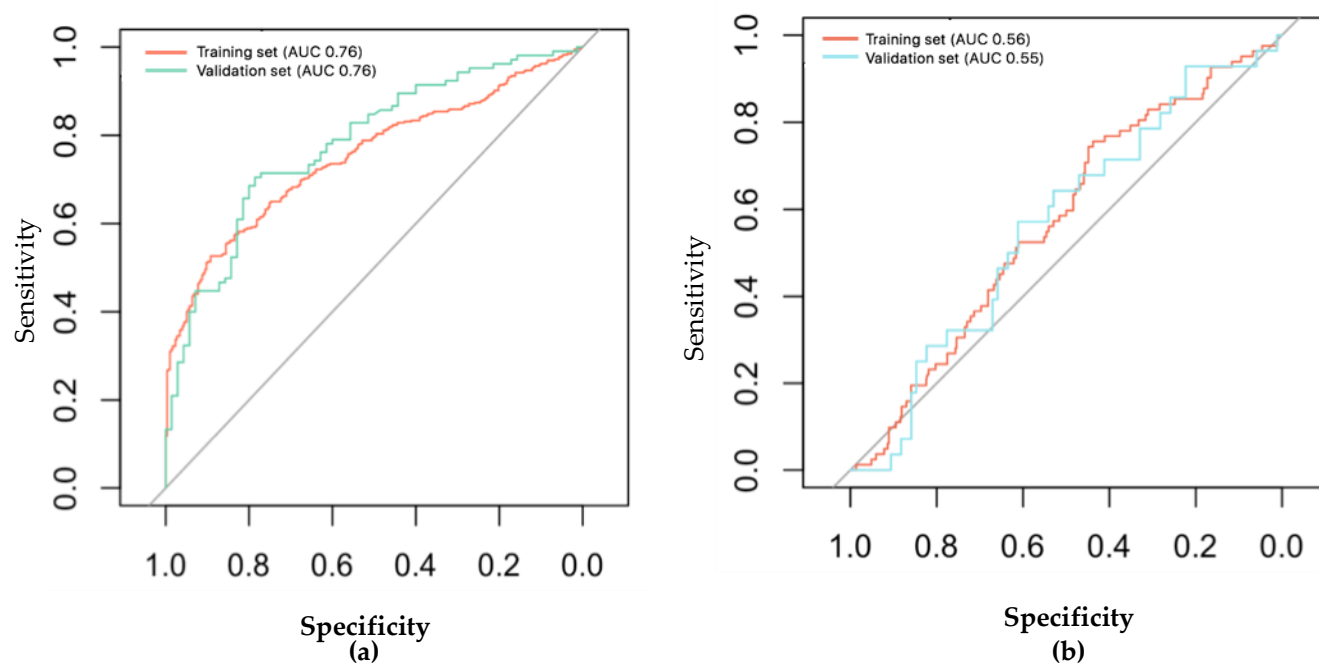

**Figure S2.** ROC analyses showing the accuracy of the linear discriminant model based on principal component reduction in the training set and the independent validation set according to pack/years (less than 5 pack/years, more than 5 pack/years) for (a) asthma and COPD group: (Control: < 5 pack/years; Case: > 5 pack/years): Training set: Case = 397; Control = 297; 95% CI: 0.72–0.78; AUC: 0.76. Validation set: Case = 105; Control = 72; 95% CI: 0.71–0.84; AUC: 0.76, and (b) for healthy control group (Control: < 5 pack/years; Case: > 5 pack/years): Training set: AUC: 0.56 (95% CI: 0.50–0.61); Validation set: AUC: 0.55 (95% CI: 0.58–0.74).

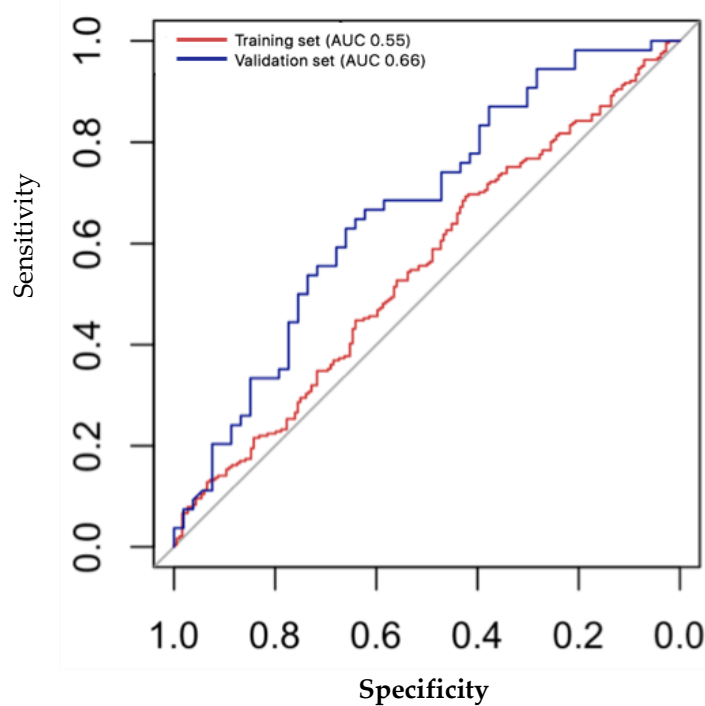

**Figure S3.** ROC-curve, which shows the accuracy of the linear discriminant model based on principal component reduction in the asthmatic population (training and validation set), to distinguish ever (n = 237) and never smokers (n = 295). Training set Case = 184; Control = 241: AUC: 0.55; 95% CI: 0.49–0.60; Validation set Case = 53; Control = 54: AUC 0.66; 95% CI 0.56–0.77.

Due to the extremely small proportion of non-smokers in the COPD group (number of ever-smokers = 356; never smokers = 8), we did not perform the same analysis in the COPD group of patients, considering that the accuracy of the model would not have been a good performance measure in this case.

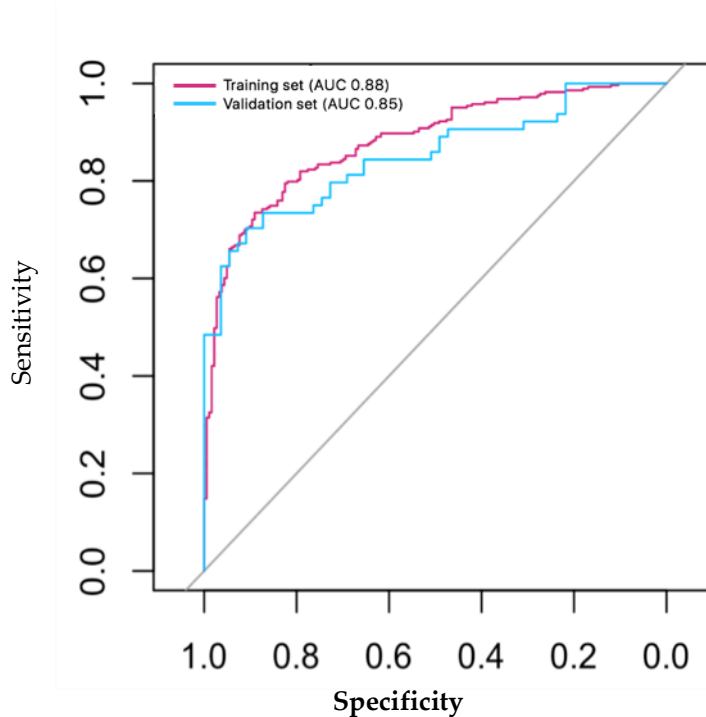

**Figure S4.** ROC-curve, which shows the accuracy of the linear discriminant model based on principal component reduction in the ever smokers population (train and validation set), to distinguish asthma (n = 237) and COPD (n = 356) patients. Training set Case = 182; Control = 292: AUC: 0.88; 95% CI: 0.85–0.91; Validation set Case = 55; Control = 64: AUC: 0.85; 95% CI: 0.78–0.92.

**Table S1.** Demographics of asthma patients stratified by smoking status. Data are expressed in number of patients, mean  $\pm$  standard deviation or median and range for non-normal distributions.

| Asthma patients          | Ever-smokers<br>(n = 237) | Never Smokers<br>(n = 295) | p-value |
|--------------------------|---------------------------|----------------------------|---------|
| Age (mean (SD))          | 56.22 (12.47)             | 47.91 (17.94)              | <0.001  |
| BMI (mean (SD))          | 28.92 (5.82)              | 26.88 (6.27)               | 0.002   |
| Gender = M/F (%)         | 108/129 (45.6/54.4)       | 109/186 (36.9/63.1)        | 0.074   |
| Allergy = Y/N (%)        | 121/59 (51.0/24.9)        | 207/88 (70.2/29.8)         | 0.803   |
| FEV1 (mean (SD)) (l)     | 2.60 (0.80)               | 2.65 (0.92)                | 0.194   |
| FEV1/VC (mean (SD)) (%)  | 66 (13)                   | 70 (14)                    | 0.007   |
| Pack/year (median [IQR]) | 12.00 [4.50, 21.00]       | 0.00 [0.00, 0.00]          | <0.001  |
| ACQ (median [IQR])       | 1.57 [0.71, 2.29]         | 1.43 [0.71, 2.29]          | 0.037   |
| ICS = N/Y (%)            | 31/206<br>(13.1/87)       | 46/249 (15.6/84.4)         | 0.034   |
| Oral corticosteroids (%) |                           |                            | 0.020   |

|             |             |             |
|-------------|-------------|-------------|
| Yes, now    | 5 ( 2.1)    | 5 ( 1.7)    |
| Yes, before | 34 ( 14.3)  | 32 ( 10.8)  |
| No          | 198 ( 83.5) | 258 ( 87.5) |

**Table S2.** Demographics of COPD patients stratified by smoking status. Data are expressed in number of patients, mean  $\pm$  standard deviation or median and range for non-normal distributions.

| COPD patients            | Ever Smokers<br>(n = 356) | Never Smokers<br>(n = 8) | p-value |
|--------------------------|---------------------------|--------------------------|---------|
| Age (mean (SD))          | 67.78 (8.93)              | 66.88 (10.51)            | <0.001  |
| BMI (mean (SD))          | 27.79 (5.74)              | 26.15 (5.84)             | 0.011   |
| Gender = M/F (%)         | 175/181<br>(49.1/50.8)    | 4/4 (50.0/50.0)          | 0.508   |
| FEV1 (mean (SD)) (l)     | 1.60 (0.67)               | 1.72 (0.85)              | 0.603   |
| FEV1/VC (mean (SD)) (%)  | 60.97 (17.11)             | 71.88 (21.01)            | 0.161   |
| Pack/year (median [IQR]) | 38.00 [20.25, 50.00]      | 0.00 [0.00, 0.00]        | <0.001  |
| CCQ (median [IQR])       | 2.00 [1.20, 2.80]         | 2.90 [1.68, 3.30]        | 0.231   |
| ICS = No/Yes (%)         | 139/217<br>(39.0/60.9)    | 1/7 (12.5/87.5)          | 0.336   |
| Oral corticosteroids (%) |                           |                          | 0.830   |
| Yes, now                 | 9 ( 2.5)                  | 0 ( 0.0)                 |         |
| Yes, before              | 27 ( 7.6)                 | 0 ( 0.0)                 |         |
| No                       | 320 ( 89.8)               | 8 (100.0)                |         |
